# Supplementary material
Source: Research Square preprint supplement (doi:10.21203/rs.3.rs-9739369/v1)
Supplement: Supplementary file 1 [file ccc8ebefef5c1b083a1ecd73.docx]

**Supplementary Methods**

This supplementary document provides additional implementation details and supporting analyses for the stromal–vascular barrier manuscript. Supplementary Methods describe staining, image preprocessing, registration, segmentation, and image-derived feature extraction.

**Supplementary Methods: image preprocessing and feature extraction**

**H&E and multiplex immunofluorescence staining**

Staining followed a sequential workflow in which multiplex immunofluorescence (mIF) staining was performed before hematoxylin and eosin (H&E) staining. mIF staining was conducted using standard protocols with the Akoya Biosciences Opal Dye Kit (Cat. #NEL861001KT). H&E staining was subsequently performed on the same or adjacent sections to provide morphologic reference, with hematoxylin highlighting nuclei and eosin providing cytoplasmic and stromal contrast.

Three mIF panels were used. Panel 1 profiled lymphoid and immune features and included FOXP3, CD20, Ki67, CD3, and CD8. Panel 2 profiled suppressive immune and macrophage-associated markers and included CD8, PD-1, PD-L1, CD163, and CD68. Panel 3 profiled stromal, vascular, tumor, neutrophil, and NK-related compartments and included SMA, CD66b, CD31, CD56, and Pan-cytokeratin. All mIF panels included DAPI for nuclear detection. After digitization, H&E and mIF images were computationally superimposed using the registration pipeline described in the main Methods. Marker positivity was determined from fluorescence intensity thresholds applied to segmented cells.

**Stain normalization**

H&E images were normalized before registration and feature extraction. Large RGB/TIFF images were read using image-aware readers with support for TIFF-based formats. Brightness standardization was applied before stain normalization to reduce inter-slide staining variability. For quality review, thumbnail comparisons of original and normalized images were generated and stored with the processing outputs.

**H&E–multiplex immunofluorescence registration**

Normalized H&E images were registered to multiplex immunofluorescence images using a batch registration workflow. Registration used feature-based alignment with high keypoint counts, thumbnail-level processing for computational efficiency, and tiled/chunked processing for large images. The workflow included retry logic for failed or low-quality registration attempts. Final registered outputs preserved the H&E reference and aligned multiplex immunofluorescence channels for downstream segmentation, phenotype assignment, and spatial-feature extraction.

**Registration quality control**

Registration quality was evaluated using multiple complementary metrics rather than a single score. Metrics included phase cross-correlation, structural similarity, mutual information, and image correlation. Downsampled images were used to make quality assessment scalable across the cohort. Overlay visualizations and summary reports were generated to support manual review. Low-quality registered images could be flagged or excluded based on prespecified quality-score thresholds.

**Non-specific fluorescence and autofluorescence correction**

Multiplex immunofluorescence images were corrected for non-specific fluorescence using an adaptive autofluorescence-based approach. An autofluorescence channel was used to estimate fine- and coarse-scale background components. For selected immune-marker channels, correction was applied when channel intensity showed sufficient correlation with the autofluorescence signal. Local contrast was used to adaptively combine fine and coarse background estimates, allowing stronger background subtraction in low-contrast regions while preserving high-contrast marker-positive signal.

**Cell segmentation and cell-level measurements**

Cell segmentation was performed using a Cellpose-based two-dimensional segmentation workflow applied to processed H&E images. The model used automated cell-size estimation when the cell diameter was not specified. Cell masks were used to extract cell-level measurements and spatial coordinates. These outputs supported phenotype assignment, cellular abundance summaries, contact measurements, and nearest-neighbor spatial features.

**Image-derived spatial features**

Cellular composition features summarized the fraction of tumor, CAF, endothelial, neutrophil, NK, and immune cell populations per core. Contact features quantified local spatial adjacency between biologically relevant compartments, including tumor–CAF, tumor–endothelial, and CAF–endothelial coupling. Nearest-neighbor features quantified spatial proximity between tumor cells and stromal or vascular compartments. These feature classes were used to construct the stromal–vascular barrier score and to support feature-level interpretation.

**Supplementary Figure 1：Score-construction robustness**

The stability of the stromal–vascular barrier phenotype was evaluated using feature-space projection, raw feature distributions, alternative score definitions, representative cores, correlation-module structure, and full feature-level high-versus-low effect sizes. These analyses support the interpretation that the barrier phenotype is a coordinated tissue-architecture state rather than a single-feature artifact.

Supplementary Figure 1 (A) Feature-space projection of specimens colored by barrier group, supporting separation of low, intermediate, and high barrier states in the multivariate feature space. (B) Raw feature distributions across barrier groups, showing the underlying unstandardized cellular and spatial feature shifts. (C) Barrier score construction sensitivity analysis, comparing alternative score definitions with the final stromal–vascular barrier score. (D) Representative low- and high-barrier cores, linking visual morphology to measured stromal-vascular architecture. (E) Quantitative feature summary for the representative low- and high-barrier cores. (F) Correlation-module robustness of barrier features, summarizing within- and between-module coherence. (G) Full high-versus-low feature effect-size forest plot. Points indicate Cohen's d for high minus low barrier groups; horizontal lines indicate bootstrap 95% confidence intervals. FDR q-values represent Benjamini-Hochberg-adjusted p-values across tested features.

**Supplementary Figure 2：Immune association robustness:**

Extended immune analyses included the full immune-feature association matrix, TMA-stratified association robustness, spatial cutoff sensitivity, and covariate-adjusted immune association models. These analyses support the main finding that the barrier phenotype is linked to immune-context remodeling and spatial CD8 organization.

Supplementary Figure 2. Extended immune association and spatial robustness analyses. (A) Full immune-feature association matrix showing Spearman correlations between stromal–vascular barrier score and immune-context features. FDR q-values represent Benjamini-Hochberg-adjusted p-values across immune features. (B) TMA-stratified robustness analysis of selected barrier-immune associations, showing whether correlations are consistent across TMA batches. (C) Spatial cutoff sensitivity analysis, evaluating whether high-versus-low near-CD8 enrichment differences are robust to alternative barrier group cutoffs. (D) Covariate-adjusted immune association robustness, showing adjusted standardized beta coefficients and 95% confidence intervals for immune features associated with the barrier score.

**Supplementary Figure 3：Clinical modeling robustness**

Clinical robustness analyses included clinical covariate availability, univariate clinical associations, coefficient stability across clinical model specifications, bootstrap model performance, and event burden by barrier group. These analyses support the interpretation that the stromal–vascular barrier score provides clinical information complementary to standard clinicopathologic variables.

Supplementary Figure 3. Clinical transparency and model robustness analyses. (A) Availability of clinical covariates used in the clinical association analyses. (B) Univariate clinical associations between stromal–vascular barrier score and clinicopathologic endpoints; points indicate odds ratios and horizontal lines indicate 95% confidence intervals. (C) Barrier coefficient stability across model specifications, showing log odds ratios for stromal–vascular barrier score under alternative clinical adjustment sets. (D) Bootstrap model performance comparing clinical-only and clinical-plus-barrier models; points indicate median AUC and horizontal intervals indicate bootstrap 95% intervals. (E) Clinical event burden by barrier group, showing event rates for nodal involvement, metastasis, lymphovascular invasion, and perineural invasion.

**Supplementary Figure 4: Cross-cancer sensitivity**

Cross-cancer sensitivity analyses evaluated cohort transparency, full feature-concordance structure, score distribution by tumor type, analytic-variable availability, and sensitivity to excluding low-sample-size tumor lineages. The conserved directionality of feature coupling supports cross-cancer recurrence of a barrier-like niche.

Supplementary Figure 4. (A) Cross-cancer tissue microarray (TMA) cohort and data availability by tumor type, including sample counts and median cell counts. (B) Full cross-cancer feature-concordance matrix, showing direction-aligned Spearman correlations between multi-cancer barrier-like score and core features across tumor lineages. (C) Multi-cancer barrier-like score distribution by tumor type. (D) Low-, intermediate-, and high-barrier-like group composition by tumor type. (E) Cross-cancer TMA analytic-variable availability, summarizing completeness of the features required for cross-cancer barrier-like niche analysis. (F) Sensitivity to excluding low-sample-size tumor types, showing that the median aligned correlation and fraction of positive correlations remain stable after applying minimum sample-size thresholds.

**Supplementary Figure 5: External validation sensitivity**

External validation analyses documented public cohort signature and endpoint availability, signature-definition sensitivity, full public-program associations, exploratory survival endpoint transparency, and spatial ring-parameter sensitivity. These analyses support cross-modal convergence of the image-derived barrier phenotype with public transcriptomic and spatial transcriptomic data.

Supplementary Figure 5. External validation sensitivity and spatial robustness analyses. (A) Public cohort signature and endpoint availability, summarizing sample counts, gene module availability, MSI/MMR status, and survival endpoint availability. (B) Signature-definition sensitivity analysis, comparing alternative module-based definitions with the final transcriptomic barrier signature. (C) Full public-program association heatmap showing Spearman correlations between the barrier signature and biological programs across public cohorts. (D) Exploratory survival endpoint forest plot, showing hazard ratios for the transcriptomic barrier signature across available public survival endpoints. (E) Spatial ring-parameter sensitivity analysis, showing the relative T-cell decline from barrier-high cores under alternative outer-ring definitions.

**Supplementary Table 1**

List of the used antibodies, antigen retrieval (AR), dilutions, and Opal dyes for multiplex fluorescence immunohistochemistry

(1) Panel 1—lymphoid/immune markers: FOXP3, CD20, Ki67, CD3, CD8.

| Opal dye | Antibody target | Identifier | AR | Dilution |
| --- | --- | --- | --- | --- |
| 480 | CD20 | Proteintech, Cat#: 60271-1-Ig | AR9 | 1:1000 |
| 520 | CD8 | Cell Signaling, Cat#: CST#70306 | AR9 | 1:200 |
| 620 | Ki-67 | Proteintech, Cat#: 27309-1-AP | AR9 | 1:3000 |
| 690 | FOXP3 | Proteintech, Cat#: 22228-1-AP | AR9 | 1:1000 |
| 780 | CD3 | Proteintech, Cat#: 17617-1-AP | AR9 | 1:3000 |

(2) Panel 2—suppressive immune markers: CD8, PD-1, PD-L1, CD163, CD68.

| Opal dye | Antibody target | Identifier | AR | Dilution |
| --- | --- | --- | --- | --- |
| 520 | CD68 | Cell Signaling, Cat#: CST#76437 | AR6 | 1:400 |
| 570 | CD8 | Cell Signaling, Cat#: CST#70306 | AR9 | 1:200 |
| 620 | PD-L1 | Cell Signaling, Cat#: CST#13684 | AR9 | 1:100 |
| 690 | PD-1 | Cell Signaling, Cat#: CST#86163 | AR9 | 1:150 |
| 780 | CD163 | Abcam, Cat#: ab182422 | AR9 | 1:500 |

(3) Panel 3—stromal and vascular markers: SMA, CD66b, CD31, CD56, Panck.

| Opal dye | Antibody target | Identifier | AR | Dilution |
| --- | --- | --- | --- | --- |
| 520 | Panck | MXB, Cat# MAB-0671 | AR9 | Ready to use |
| 570 | SMA | MXB, Cat#: MAB-0890 | AR9 | Ready to use |
| 620 | CD31 | MXB, Cat#: MAB-0720 | AR9 | Ready to use |
| 690 | CD66b | Proteintech, Cat#: 30875-1-AP | AR9 | 1:1000 |
| 780 | CD56 | MXB, Cat#: MAB-0743 | AR9 | Ready to use |

**Supplementary Table 2**

Patient characteristics. The table summarizes the retrospective CRC source cohort, the 480-core CRC image-analysis cohort, and 124-core cross-cancer TMA cohort.

| Characteristic | Value |
| --- | --- |
| CRC source and image-analysis cohort |  |
| Source retrospective resection cohort | 1288 patients |
| Patients with physician-monitored survival follow-up | 666 patients |
| Main CRC image-analysis cohort | 480 TMA cores |
| Unit of CRC image analysis | TMA core |
| CRC barrier group distribution | low: 160/480 (33.3%); intermediate: 160/480 (33.3%); high: 160/480 (33.3%) |
| Age, median (IQR), years | 63 (53-71) |
| Male sex | 297/471 (63.1%) |
| MSI/MMR status | pMMR/MSS: 380/433 (87.8%); dMMR/MSI-H: 53/433 (12.2%) |
| Node-positive disease | 201/465 (43.2%) |
| Metastasis | 44/462 (9.5%) |
| Lymphovascular invasion | 298/466 (63.9%) |
| Perineural invasion | 117/466 (25.1%) |
| High grade | 67/471 (14.2%) |
| High pT category | 50/466 (10.7%) |
| Cross-cancer multi-TMA cohort |  |
| Multi-TMA image-analysis cohort | 124 TMA cores |
| Number of tumor lineages | 10 tumor types |
| Tumor type composition |  |
| Endometrium | 19/124 (15.3%) |
| Cervix | 15/124 (12.1%) |
| Ovary | 15/124 (12.1%) |
| Prostate | 13/124 (10.5%) |
| Esophagus | 13/124 (10.5%) |
| Lung | 13/124 (10.5%) |
| Stomach | 11/124 (8.9%) |
| Bladder | 10/124 (8.1%) |
| Liver | 9/124 (7.3%) |
| Breast | 6/124 (4.8%) |
| Multi-TMA barrier group distribution | low: 39/118 (33.1%); intermediate: 39/118 (33.1%); high: 40/118 (33.9%) |
| Cells per core, median (IQR) | 11538 (8866-17845) |
| Multi-cancer barrier-like score, median (IQR) | 0.43 (-1.67-2.08) |
